# Supplementary material for: Promoting C–C coupling for CO2 reduction on Cu2O electrocatalysts with atomically dispersed Rh atoms
Source: Royal Society of Chemistry journal article supplement (doi:10.1039/d4cc01254b), 2024-01-01
Supplement: d4cc01254b1.pdf [file d4cc01254b1.pdf]

## Supporting Information

### **Promoting C-C Coupling for CO<sub>2</sub> Reduction on Cu<sub>2</sub>O Electrocatalysts with Atomically Dispersed Rh Atoms**

#### **1. Synthesis of materials**

All chemicals are analytical grade and are used as purchased without further purification. The details are as follows: Copper (II) sulfate pentahydrate (CuSO<sub>4</sub>·5H<sub>2</sub>O, 99.0%, Sinopharm Chemical Reagent Co., Ltd.), sodium rhodium chloride dodecahydrate (Na<sub>3</sub>RhCl<sub>6</sub>·12H<sub>2</sub>O, Rh 17.1%, Alfa Aesar), oleic acid (C<sub>18</sub>H<sub>34</sub>O<sub>2</sub>, Sinopharm Chemical Reagent Co., Ltd.), ethanol (C<sub>2</sub>H<sub>5</sub>OH, 99.5%, Sinopharm Chemical Reagent Co., Ltd.), sodium hydroxide (NaOH, 96%, Sinopharm Chemical Reagent Co., Ltd.), D-(+)-glucose (Sinopharm Chemical Reagent Co., Ltd.), tetra-n-butylammonium hexafluorophosphate (BminPF<sub>6</sub>, J&K Reagent Co., Ltd.), potassium hydrogen carbonate (KHCO<sub>3</sub>, 99.5%, Sinopharm Chemical Reagent Co., Ltd.), potassium hydroxide (KOH, > 85%, Sinopharm Chemical Reagent Co., Ltd.), acetonitrile (CH<sub>3</sub>CN, 99%, Sinopharm Chemical Reagent Co., Ltd.) CO<sub>2</sub> gas (> 99.999%, Guangming, Dalian, China). Ultrapure water is obtained by the ELGA filtering system.

In a typical procedure<sup>1</sup> for the synthesis of Rh:Cu<sub>2</sub>O, y mL Na<sub>3</sub>RhCl<sub>6</sub> aqueous solution (1.3 μM) (y = 0.6, 1.2, 3.6 for different 0.005%, 0.01% and 0.03% molar ratio of Rh:Cu), 4 mL oleic acid (OA) and 20 mL absolute ethanol were added successively into 40 mL CuSO<sub>4</sub> aqueous solution (0.025 M) under vigorous stirring. The solution was heated to 373 K and then 10 mL NaOH aqueous solution (0.8 M) was added. After stirring for 5 min, 30 mL D-(+)-glucose aqueous solution (0.63 M) was added. The resulting mixture was stirred at 373 K for additional 1 h and gradually turned into a brick-red color. The resulting precipitate was collected by centrifugation, decanted by repeated washing with distilled water and absolute ethanol, and finally dried in vacuum at room temperature (RT) overnight. The products of different Rh:Cu molar ratio is denoted as x%-Rh:Cu<sub>2</sub>O (x = 0.005, 0.01, 0.03). The synthetic process of Rh:Cu<sub>2</sub>O is

shown as follows:

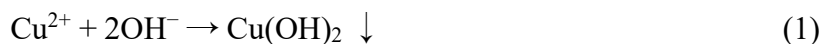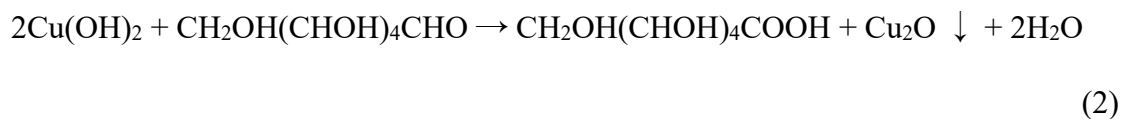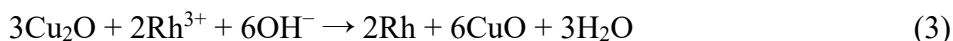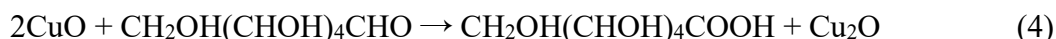

$\text{Cu}_2\text{O}$  was prepared in parallel to Rh: $\text{Cu}_2\text{O}$  by the same method without addition of  $\text{Na}_3\text{RhCl}_6$ . Post-Rh- $\text{Cu}_2\text{O}$  was prepared in parallel to Rh: $\text{Cu}_2\text{O}$  except that same amount of  $\text{Na}_3\text{RhCl}_6$  aqueous solution was added after  $\text{Cu}_2\text{O}$  growth and then kept heating for another 20 min before centrifugation.

## 2. Preparation of electrodes

The electrode for tests in an H-type cell was prepared by drop casting the catalyst ink on a carbon paper (Toray, H060). The ink was a mixture of 2 mg catalyst, 60  $\mu\text{L}$  water, 90  $\mu\text{L}$  ethanol and 50  $\mu\text{L}$  Nafion solution (1 wt.% in ethanol), ultrasonically dispersed for 30 min. The mass loading of catalyst was 1  $\text{mg cm}^{-2}$ .

The electrode for tests in a flow cell was prepared by spraying the catalyst ink onto a commercial gas diffusion electrode (Freudenberg H14C9). Typically, the catalyst ink was composed of catalyst, and Nafion ionomer dispersed in i-propanol by sonicating for 30 min. The total mass loading of catalyst was around 1.0  $\text{mg cm}^{-2}$ .

## 3. Materials characterizations

Samples were characterized by X-ray diffraction (XRD) on a Rigaku D/Max-2500/PC powder diffractometer using Cu  $K\alpha$  radiation (40 kV  $\times$  200 mA). The morphologies of prepared samples were detected with scanning electron microscopy (SEM, Hitachi Quanta 200F), field emission scanning electron microscopy (FESEM, Hitachi JSM-7900F) equipped with an energy dispersive X-ray spectrometer (EDS), and high-resolution transmission electron microscopy (HRTEM, JEOL JEM-2000EX). The high angle annular dark field scanning transmission electron microscopy (HAADF-STEM) images were taken on a probe-corrected JEM-ARM200F electron microscope

equipped with an energy dispersive X-ray spectrometer (EDS). X-ray photoelectron spectroscopy (XPS) measurements were performed using a ThermoFisher ESCALAB 250Xi spectrometer with Monochromated Al K $\alpha$  excitation (1486.6 eV, 15 kV, 10.8 mA). For the elemental ICP measurements (ICP-OES, PerkinElmer ICPS-8100), samples were dissolved by 2 M HNO<sub>3</sub>. Temperature-programmed desorption measurements with a mass detector (TPD-MS) were conducted using a Micromeritics AutoChem 2920 system with a TCD detector and coupling to an OmniStar 300 mass spectrometer.

#### 4. Electrochemical measurements

The linear sweep scans were collected in a standard three-electrode system equipped with the CHI 660e electrochemical workstation.

For tests in the H-type cell, an Ag/AgCl reference electrode, a Pt counter electrode and a Nafion-117 membrane were used. Otherwise mentioned, all potentials in the H-type cell were used without iR compensation and were converted with respect to reversible hydrogen electrode (RHE) scale by equation:  $E_{\text{RHE}} = E_{\text{Ag/AgCl}} + 0.1976 \text{ V} + 0.059 \times \text{pH}$ . The pH values of 0.5 M KHCO<sub>3</sub> saturated with Ar and CO<sub>2</sub> were 8.3 and 7.5, respectively. The selectivity and reaction rate of CO<sub>2</sub>RR were evaluated by controlled-potential electrolysis. Electrolytes were pre-saturated and bubbled with CO<sub>2</sub> during measurements.

For the tests in the flow cell, Ag/AgCl with electrolytic bridge was used as reference electrode, and Ni foil was used as count electrode. All potentials in the flow cell were converted to RHE and corrected for iR drop:  $E_{\text{RHE}} = E_{\text{Ag/AgCl}} + 0.1976 \text{ V} + 0.059 \times \text{pH} - iR \times 80\%$ . The gas diffusion electrode with catalysts, anion exchange membrane (fumasep FAA-3-PK-130), and nickel anode were combined together by using PEEK spacers so that liquid electrolytes could be introduced into the cathodic and anodic chambers. A home-made flow cell is designed according to the literatures.<sup>2, 3</sup> The anodic and cathodic chambers are filled with flowing electrolyte and separated with the membrane. The gas chamber is filled with CO<sub>2</sub>. The dimension of the flow channels was 2 cm  $\times$  0.5 cm  $\times$  0.15 cm. The CO<sub>2</sub> flow rate was 20 mL min<sup>-1</sup>, controlled by a mass flow controller. 1 M KOH was circulated with peristaltic pump and the flow

rate of the electrolytes at  $3.036 \text{ mL min}^{-1}$ . In addition, the cathodic electrolyte was bubbled with Ar during measurements.

The electrochemically active surface area (ECSA) was calculated from the double-layer capacitance ( $C_{dl}$ ) in the none-Faradic region by conducting cyclic voltammetry tests under different scan rates. As  $\text{Cu}_2\text{O}$  can easily undergo redox reactions and there is water splitting reaction in 1 M KOH, it is difficult to find the none-Faradic region. So, the cyclic voltammetry curves were measured in  $\text{CH}_3\text{CN}$  solution (0.1M BminPF<sub>6</sub>) saturated with Ar within a none-faradaic potential region ( $-0.21 \text{ V}$  to  $-0.11 \text{ V vs. RHE}$  for Rh: $\text{Cu}_2\text{O}$  and  $\text{Cu}_2\text{O}$ ,  $0.1 \text{ V}$  to  $0.2 \text{ V vs. RHE}$  for glass carbon electrode). Ten cycles were recorded at each scan rate and the current values were taken during the last cathodic scan at 0 V. The linear slopes  $k$  can be obtained from  $\Delta J/2 = (J_a - J_c)/2$  against scan rates, and  $k = C_{dl}$ . To note that, the relative electrochemical surface area estimated from the double layer capacity current included the contribution of the exposed C substrate.

## 5. Product analysis

Gas products ( $\text{H}_2$ , CO,  $\text{CH}_4$  and  $\text{C}_2\text{H}_4$ ) were quantified by an online gas chromatograph (GC, Agilent 7890A, Ar carrier and Agilent Parapak Q packed column) equipped with TCD (for  $\text{H}_2$  detection), FID detectors and a methanizer (for CO and  $\text{CH}_x$  detection). The gas flowed through the cell at a constant flow and was vented into the sampling loop of the GC. Liquid products were analyzed by a Bruker AVANCE III 400 MHz nuclear magnetic resonance (NMR) spectrometer. A mixture of liquid electrolyte, DMSO (internal standard) and  $\text{D}_2\text{O}$  was used for NMR measurements. The one dimensional  $^1\text{H}$  spectrum was measured with water suppression using a presaturation method.

## 6. Computational details

All calculations were carried out in Vienna Ab-initio Simulation Package (VASP) based on spin-polarized density functional theory (DFT).<sup>4,5</sup> The exchange–correlation energy was expressed by the generalized gradient approximation with Perdew–Burke–Ernzerhof (GGA-PBE) functional,<sup>6</sup> and the projector augmented wave (PAW) pseudopotential was used to represent core electrons effects.<sup>7,8</sup> Cu(100) was modeled

with a  $5 \times 5 \times 4$  supercell slab in a  $15 \text{ \AA}$  vacuum. Due to the vacuum, dipole corrections were implemented. To resemble the real bulk material and the surface, respectively, two bottom layers were fixed in their positions while the two top layers were free to move due to interaction with the adsorbates. The cutoff energy was set to be  $500 \text{ eV}$  and Gaussian electron smearing method with  $\sigma = 0.05 \text{ eV}$  were used. The empirical dispersion correction (DFT-D3) method was applied to describe the long-range van der Waals (vdW) interactions in layered materials.<sup>9</sup> The convergence tolerance for residual force and energy on each atom during structure relaxation was set to  $0.02 \text{ eV/\AA}$  and  $10^{-5} \text{ eV}$ , respectively. The Monkhorst-Pack k-point mesh was set to be  $3 \times 3 \times 1$ .

The CO adsorption energy was calculated as:

$$E_{\text{ads}} = E_{*_{\text{CO}}} - (E^* + E_{\text{CO}})$$

Where,  $E_{*_{\text{CO}}}$  was the electronic structure energy of the adsorbed CO on the catalyst,  $E^*$  was the energy of the slab, and  $E_{\text{CO}}$  was the CO energy in gas phase without the catalyst.

The CO-CO coupling energy barrier was calculated according to the following reaction and the corresponding reaction free energy:

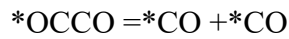

$$E_{\text{C-C coupling barrier}} = E_{*_{\text{OCCO}}} - (E_{*_{\text{CO}}} + E_{*_{\text{CO}}})$$

The reaction free energies were approximated as  $\Delta G = \Delta E + \Delta \text{ZPE} - T\Delta S$ , where  $\Delta E$  was the DFT calculated reaction energy,  $\Delta \text{ZPE}$  and  $T\Delta S$  were the zero-point energy correction and the entropy change at room temperature ( $298.15 \text{ K}$ ). The computational hydrogen electrode was used to model proton-electron pairs.<sup>10</sup>

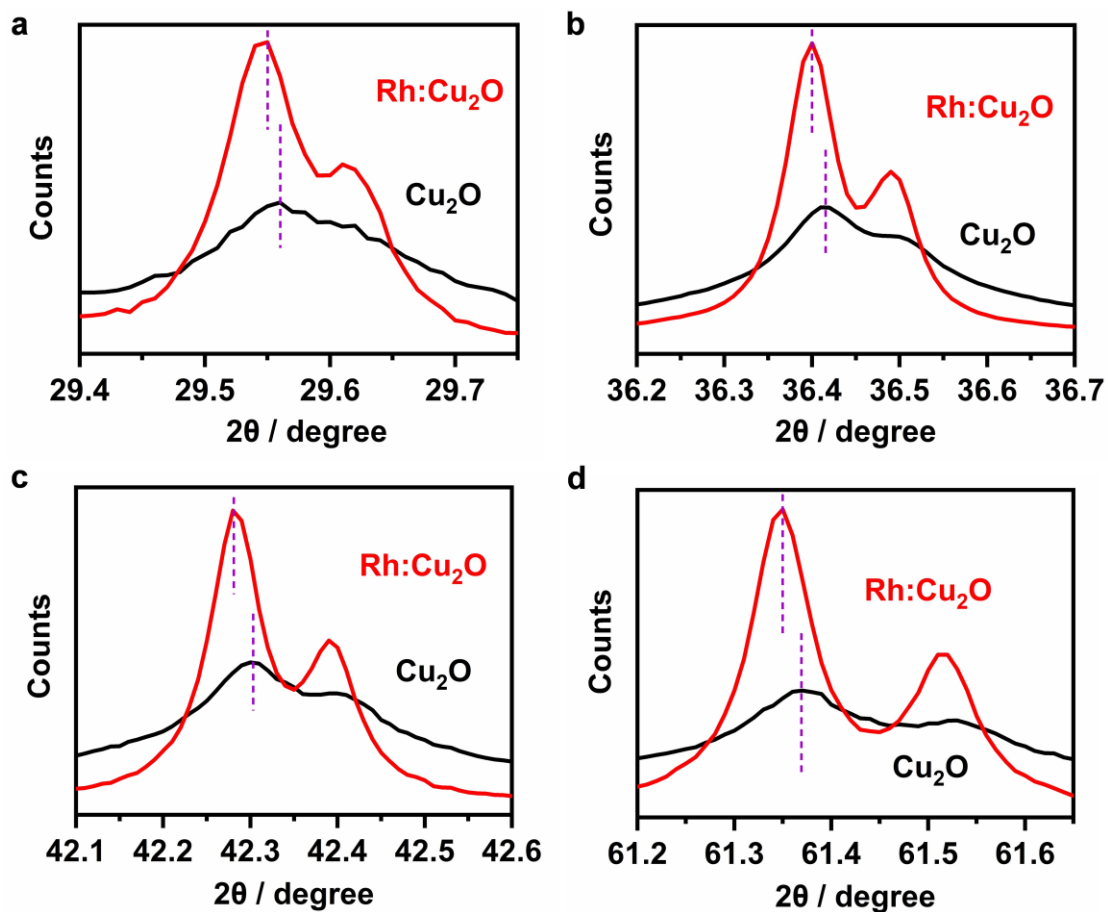

**Figure S1.** The fined XRD patterns for Rh:Cu<sub>2</sub>O and Cu<sub>2</sub>O powders supported on carbon paper with no binders. The red and black lines represent Rh:Cu<sub>2</sub>O and Cu<sub>2</sub>O respectively.

Each characteristic peak of Cu<sub>2</sub>O slightly shifts to smaller angle for around 0.02°, which illustrates the doping of Rh into Cu<sub>2</sub>O.

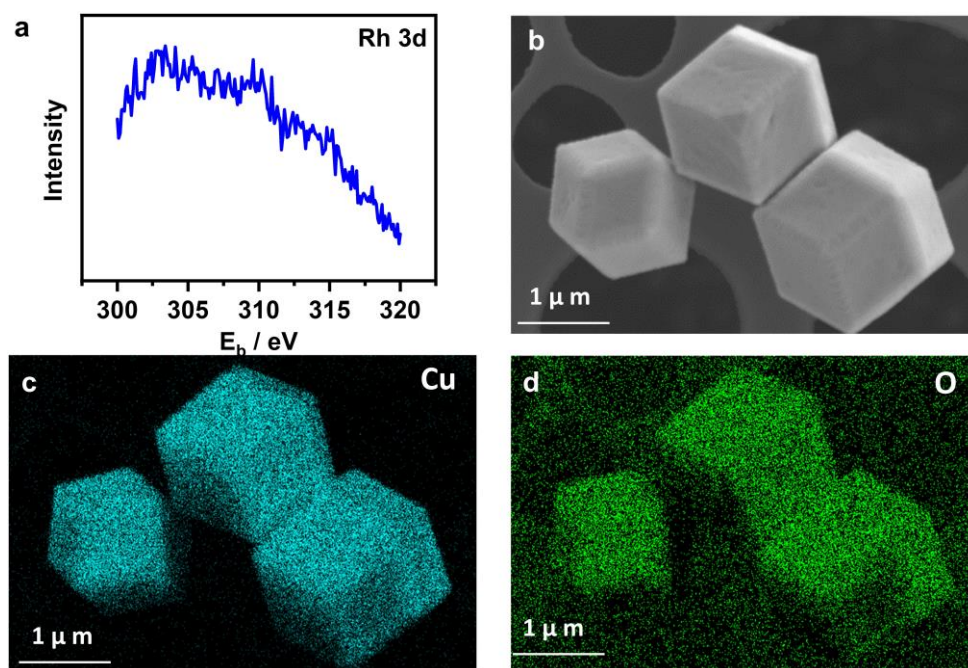

**Figure S2.** The (a) Rh 3d XPS spectra of Rh:Cu<sub>2</sub>O. All signals were calibrated by C 1s (284.6 eV). (b-d) The element mapping results of 0.1%-Rh:Cu<sub>2</sub>O tested on FESEM.

**Table S1.** Ratio of Rh to Cu in different samples determined by the ICP measurements.

| Samples                   | Molar ratio<br>$n(\text{Rh})/n(\text{Cu})$ | Mass ratio<br>$m(\text{Rh})/m(\text{Cu})$ |
|---------------------------|--------------------------------------------|-------------------------------------------|
| Rh:Cu <sub>2</sub> O      | 0.004%                                     | 0.006%                                    |
| post-Rh-Cu <sub>2</sub> O | 0.0005%                                    | 0.0007%                                   |

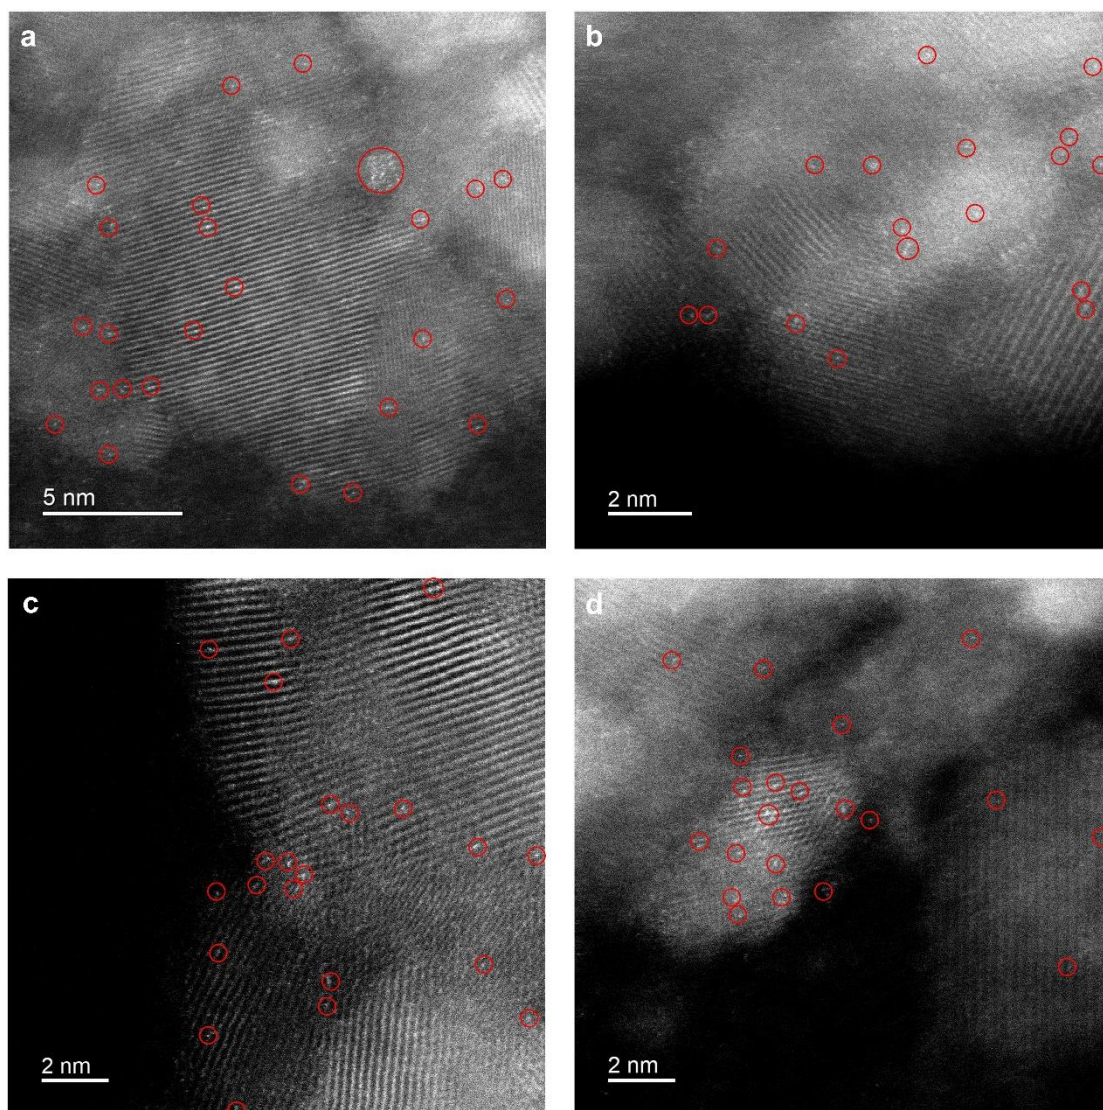

**Figure S3.** The HADDF-STEM images of Rh:Cu<sub>2</sub>O. Atomically dispersed Rh atoms were marked with red circles.



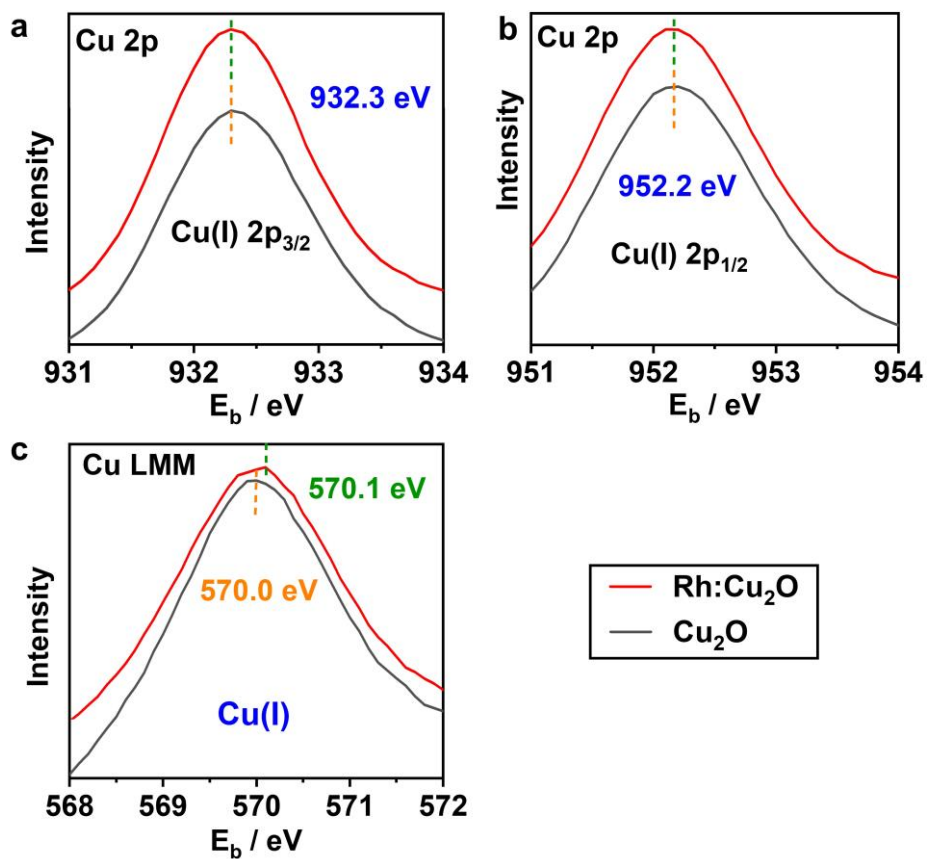

**Figure S4.** The local enlarged XPS and Auger spectra for Rh:Cu<sub>2</sub>O and Cu<sub>2</sub>O.

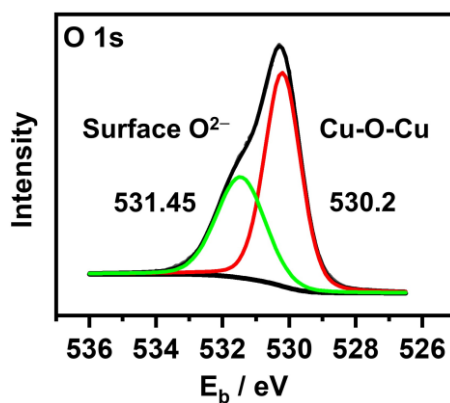

**Figure S5.** High resolution O 1s XPS spectra of Rh:Cu<sub>2</sub>O catalysts. All signals were calibrated by C 1s (284.6 eV).

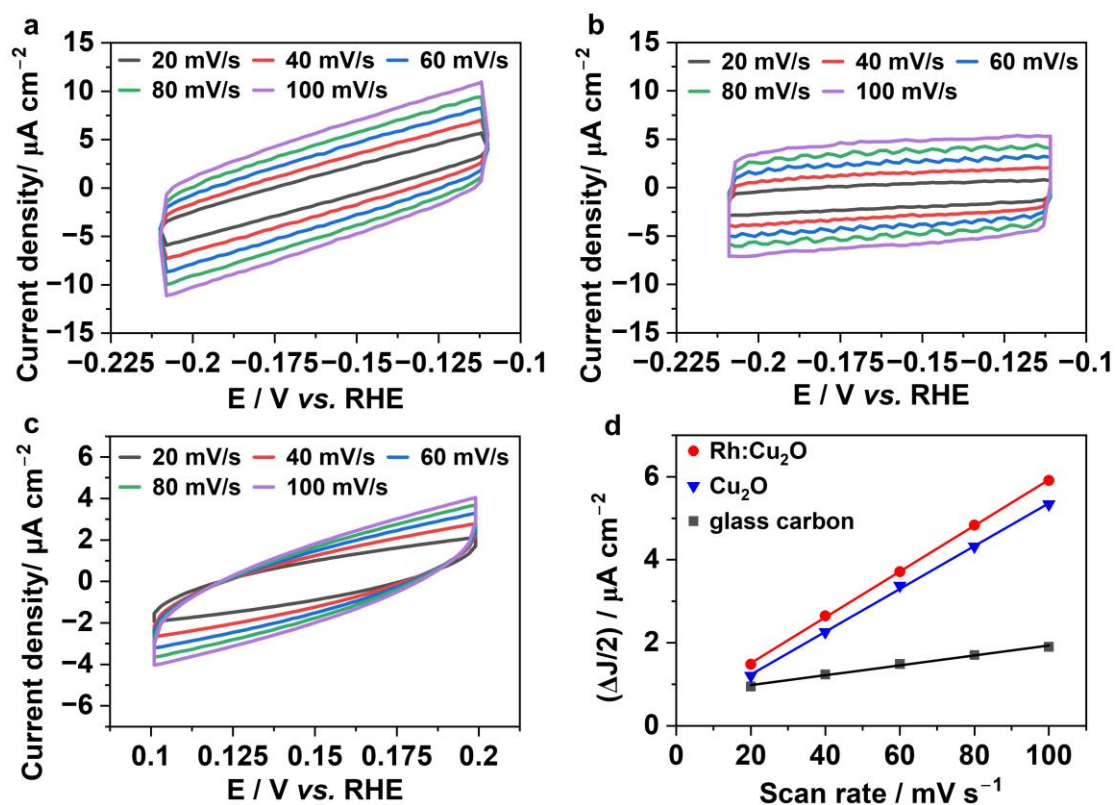

**Figure S6.** (a-c) The CV curves of Rh:Cu<sub>2</sub>O, Cu<sub>2</sub>O and glass carbon in CH<sub>3</sub>CN solution (0.1M BminPF<sub>6</sub>) saturated with Ar. (d) Half of the capacitive current density of different catalysts in CH<sub>3</sub>CN solution (0.1M BminPF<sub>6</sub>) as a function of scan rate over a non-faradic potential range.

Based on the data in **Figure S6**, the calculated double-layer capacitances of Rh:Cu<sub>2</sub>O, Cu<sub>2</sub>O and glass carbon are 55.2, 51.6 and 11.9  $\mu\text{F cm}^{-2}$ , respectively. Supposing the geometric area of the glass carbon electrode is 1  $\text{cm}^2$ , the relative electrochemical active surface area of Rh:Cu<sub>2</sub>O and Cu<sub>2</sub>O is 4.63 and 4.33  $\text{cm}^2$ , respectively.

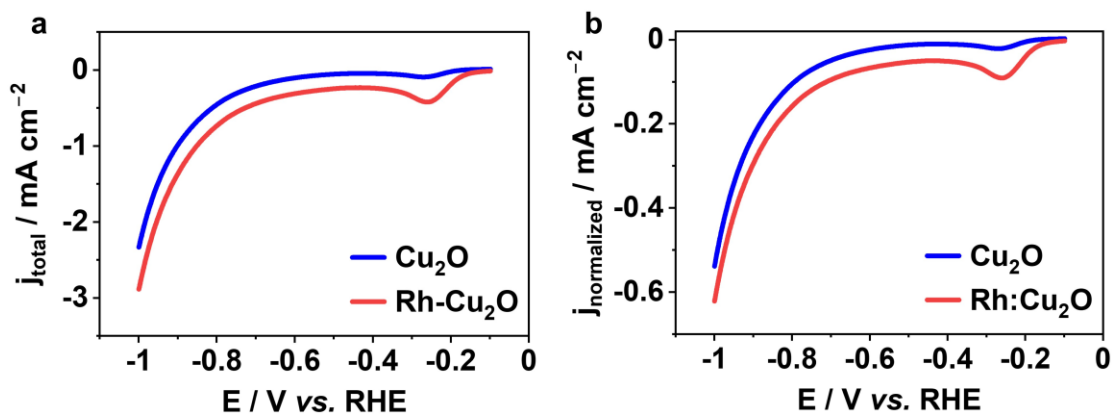

**Figure S7.** (a) The LSV scans of Rh:Cu<sub>2</sub>O and Cu<sub>2</sub>O in an H-type cell with 0.5 M KHCO<sub>3</sub> saturated with CO<sub>2</sub>. (b) The ECSA-normalized LSV curves of Rh:Cu<sub>2</sub>O and Cu<sub>2</sub>O in an H-type cell with 0.5 M KHCO<sub>3</sub> saturated with CO<sub>2</sub>.

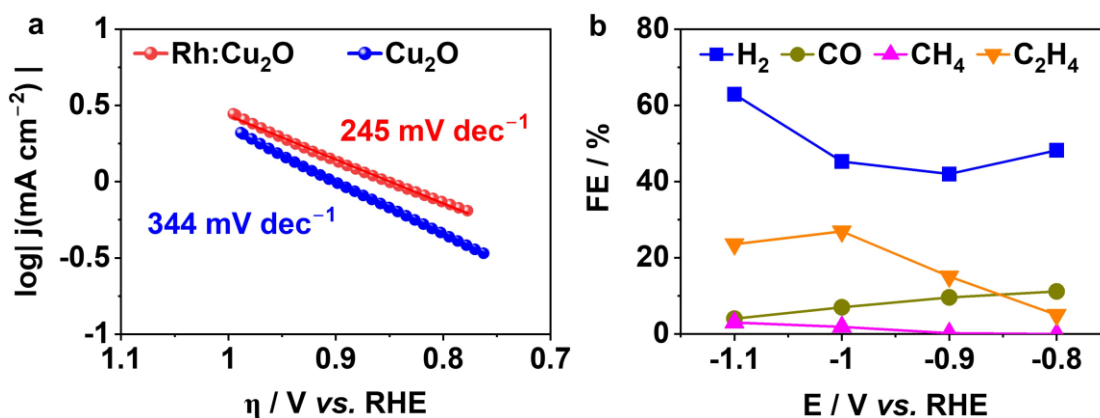

**Figure S8.** (a) The Tafel plots of Rh:Cu<sub>2</sub>O and Cu<sub>2</sub>O, and (b) FEs of gas products of CO<sub>2</sub>RR with Rh:Cu<sub>2</sub>O at different potentials. Condition: in an H-type cell with 0.5 M KHCO<sub>3</sub> saturated with CO<sub>2</sub>.

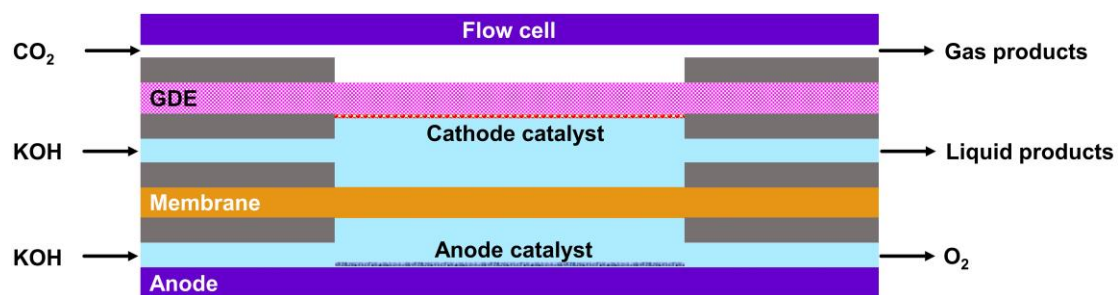

**Figure S9.** A schematic diagram of the flow cell.

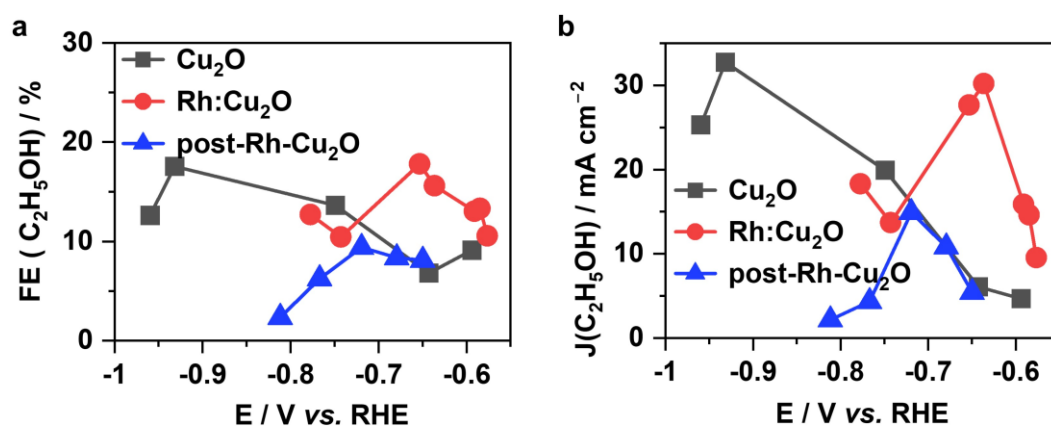

**Figure S10.** (a) FE(C<sub>2</sub>H<sub>5</sub>OH) and (b) J(C<sub>2</sub>H<sub>5</sub>OH) on Cu<sub>2</sub>O, Rh:Cu<sub>2</sub>O and post-Rh-Cu<sub>2</sub>O at different potentials in a flow cell.

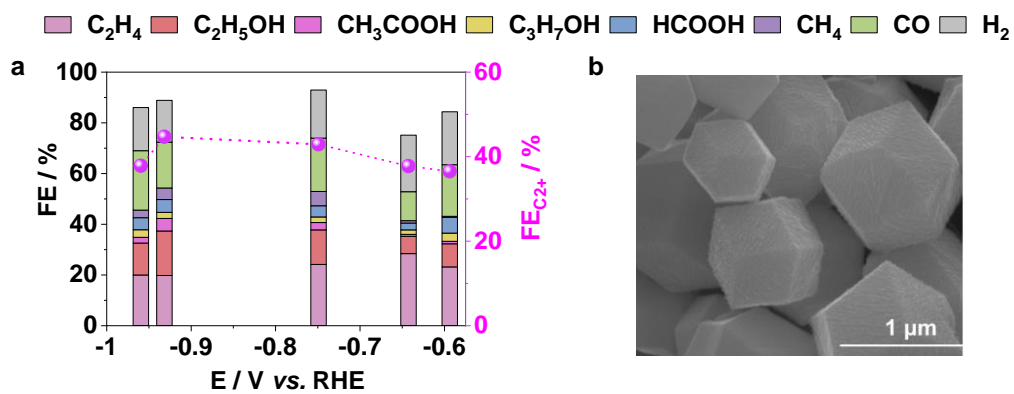

**Figure S11.** (a) FEs of various products on post-Rh-Cu<sub>2</sub>O at different potentials in a flow cell. (b) SEM images of post-Rh-Cu<sub>2</sub>O.

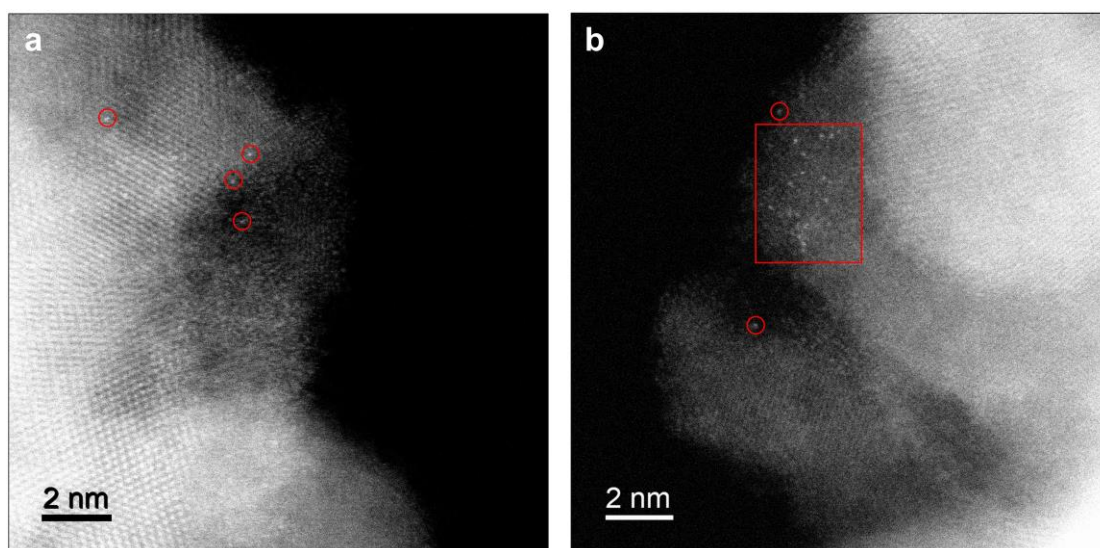

**Figure S12.** HAADF-STEM images of Rh in post-Rh-Cu<sub>2</sub>O.

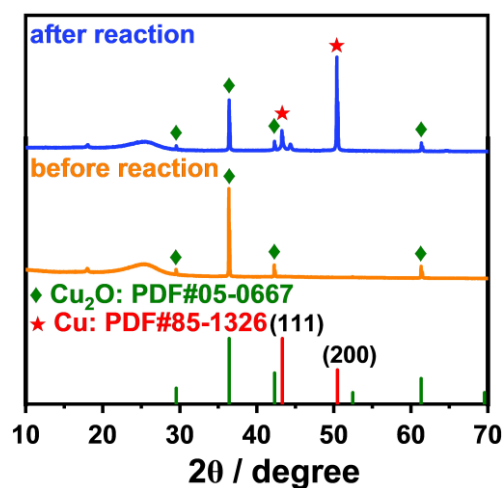

**Figure S13.** XRD patterns of Rh:Cu<sub>2</sub>O before and after CO<sub>2</sub>RR reduction.

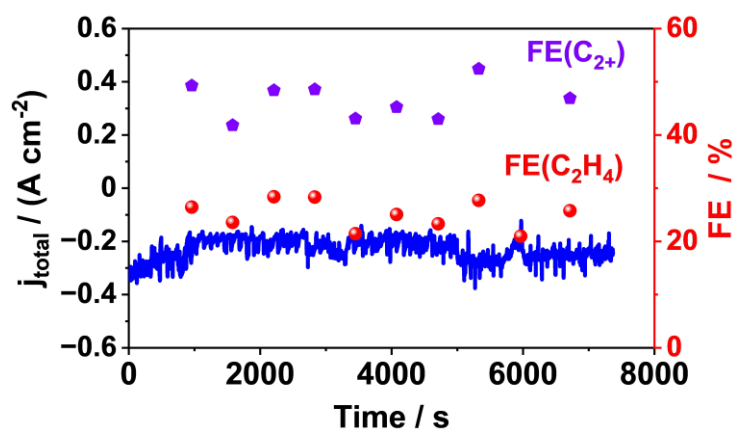

**Figure S14.** The durability test of Rh:Cu<sub>2</sub>O at around  $-0.68$  V assessed in the flow cell.

It shows that the FE(C<sub>2+</sub>) and FE(C<sub>2</sub>H<sub>4</sub>) maintain at around 46.5% and 25.1% respectively during 2 h.

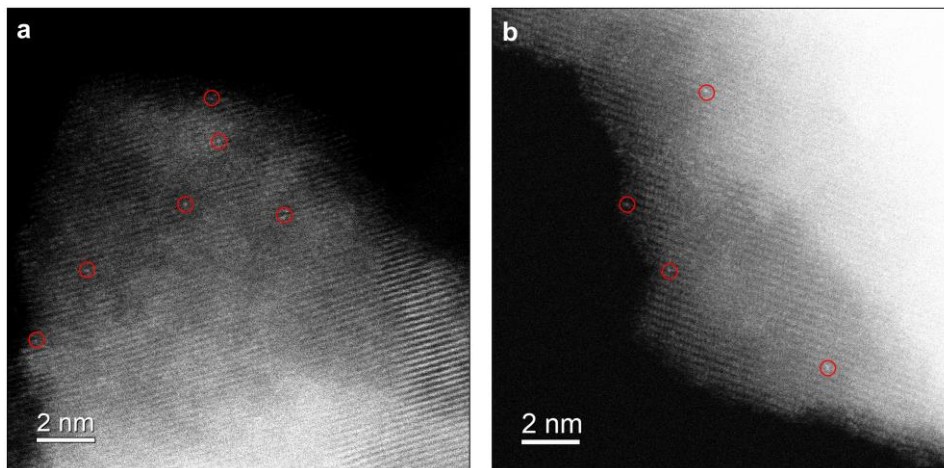

**Figure S15.** HAADF-STEM images of Rh:Cu<sub>2</sub>O after electrolysis.

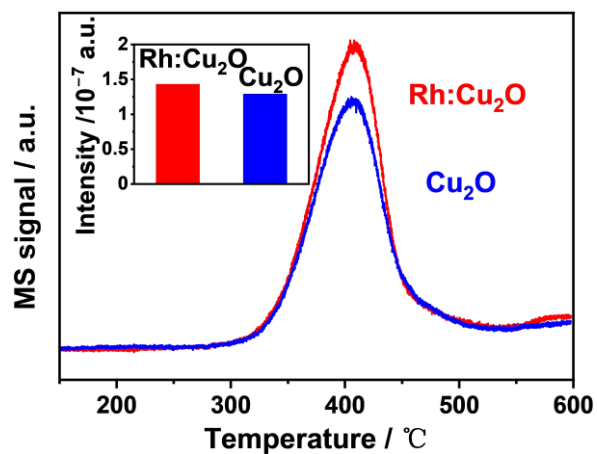

**Figure S16.** CO<sub>2</sub> TPD-MS spectra of Rh:Cu<sub>2</sub>O and Cu<sub>2</sub>O. To clearly identify the desorbed CO<sub>2</sub> signal, the mass-to-charge ( $m/z$ ) ratio was set at 44.

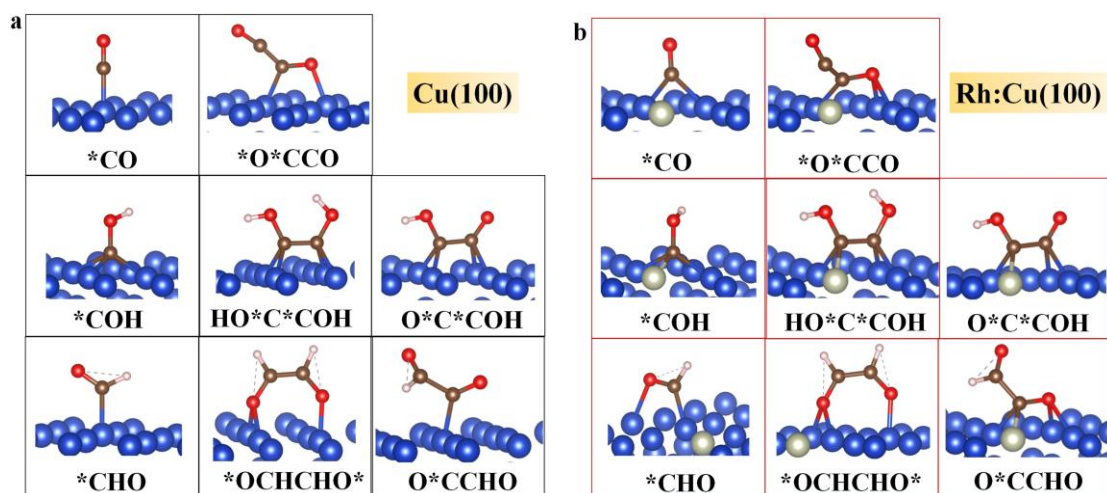

**Figure S17. Optimized structures of main adsorption intermediates.** The structures of intermediates during CO<sub>2</sub>RR to ethylene and ethanol on (a) Cu(100) surfaces and (b) Rh:Cu(100) surfaces. The blue, white, brown, red and pink balls represented Cu, Rh, C, O and H, respectively.



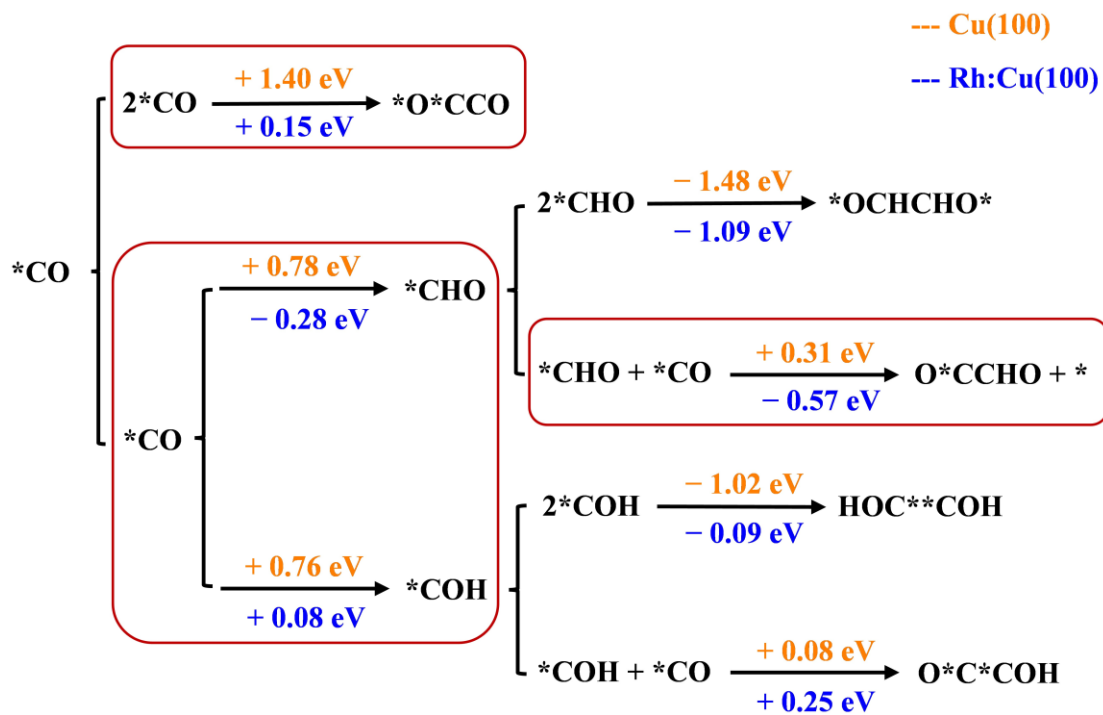

**Figure S18.** The changes of Gibbs free energy ( $\Delta G$ ) of different C–C coupling pathways. The orange and blue numbers represented the  $\Delta G$  on Cu(100) and Rh:Cu(100) surfaces, respectively.

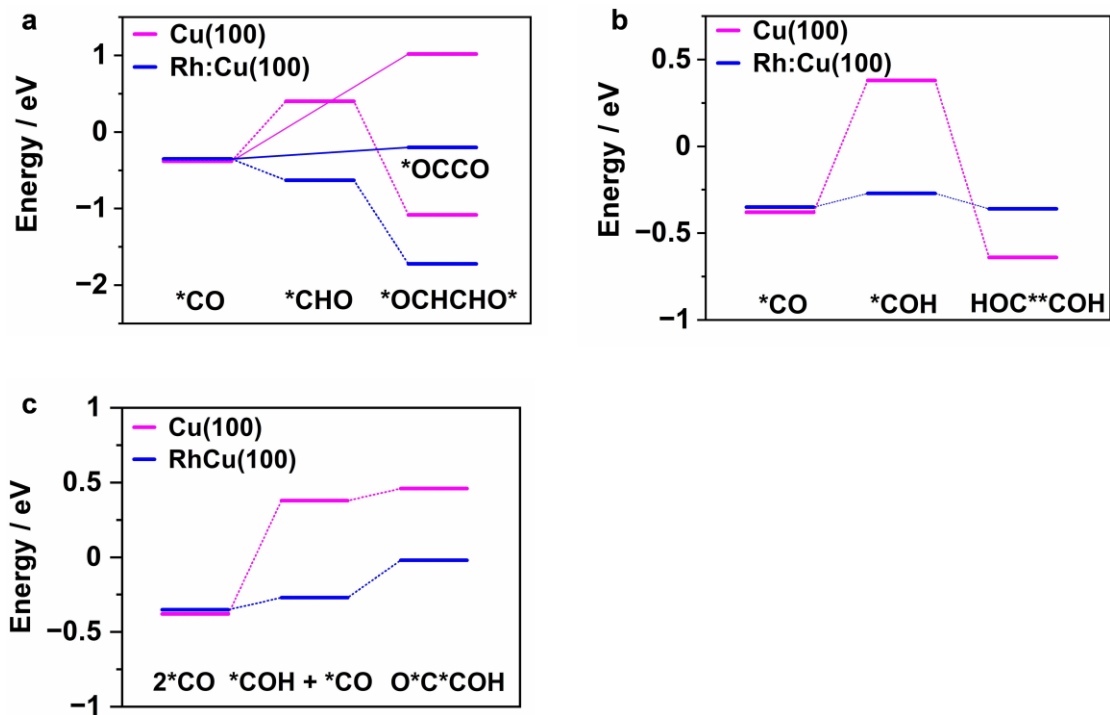

**Figure S19.** The changes of Gibbs free energy ( $\Delta G$ ) of possible different C–C coupling pathways.

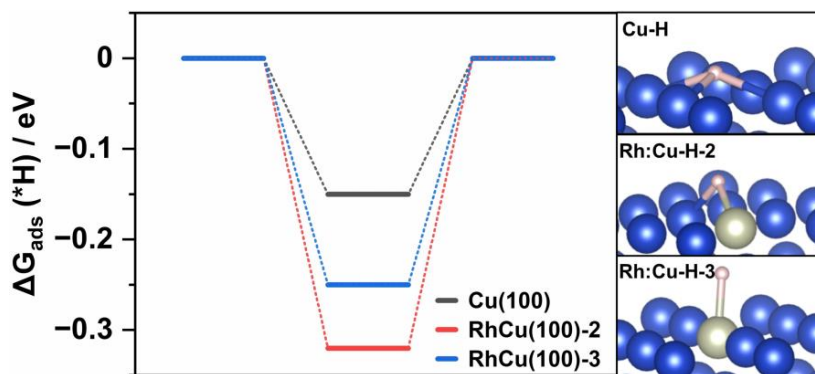

**Figure S20.** The changes of Gibbs free energy ( $\Delta G_{\text{ads}}(*\text{H})$ ) of hydrogen atom adsorption on Rh:Cu(100) and Cu(100) surface with different configurations.

It shows that the energy barrier of hydrogen atom adsorption ( $*\text{H}$ ) on Cu sites adjacent to Rh atoms is much lower ( $-0.32$  eV) than on pristine Cu sites ( $-0.15$  eV).

## References

- 1.Z. Zhang, S. S. Wang, R. Song, T. Cao, L. Luo, X. Chen, Y. Gao, J. Lu, W. X. Li, W. Huang, *Nat. Commun.*, 2017, **8**, 488.
- 2.S. Ma, M. Sadakiyo, R. Luo, M. Heima, M. Yamauchi, P. J. A. Kenis, *Journal of Power Sources*, 2016, **301**, 219-228.
- 3.C. T. Dinh, T. Burdyny, M. G. Kibria, A. Seifitokaldani, C. M. Gabardo, F. P. G. d. Arquer, A. Kiani, J. P. Edwards, P. D. Luna, O. S. Bushuyev, C. Zou, R. Quintero-Bermudez, Y. Pang, D. Sinton, E. H. Sargent, *Science*, 2018.
- 4.G. Kresse, J. Furthmüller, *Comput. Mater. Sci.*, 1996, **6**, 15-50.
- 5.G. Kresse, J. Furthmüller, *Phys. Rev. B*, 1996, **54**, 11169-11186.
- 6.J. P. Perdew, K. Burke, M. Ernzerhof, *Phys. Rev. Lett.*, 1996, **77**, 3865-3868.
- 7.P. E. Blöchl, *Phys. Rev. B*, 1994, **50**, 17953-17979.
- 8.G. Kresse, D. Joubert, *Phys. Rev. B*, 1999, **59**, 1758-1775.
- 9.S. Grimme, J. Antony, S. Ehrlich, H. Krieg, *J. Chem. Phys.*, 2010, **132**, 154104.
- 10.J. K. Nørskov, J. Rossmeisl, A. Logadottir, L. Lindqvist, J. R. Kitchin, T. Bligaard, H. Jónsson, *J. Phys. Chem. B*, 2004, **108**, 17886-17892.
